# Supplementary material for: Probe for i-motif structure and G-rich strands using end-stacking ability
Source: Royal Society of Chemistry journal article supplement (doi:10.1039/b908624b), 2009-01-01
Supplement: b908624b.pdf [file b908624b.pdf]

## Supplementary Information

# Probe for i-motif structure and G-rich strand using end-stacking ability

Il Joon Lee, Jeong Wu Yi, and Byeang Hyeon Kim\*

*Department of Chemistry, BK School of Molecular Science  
Pohang University of Science and Technology, Pohang 790-784, Korea*

- S2 Table S1. MALDI-TOF mass spectral data.
- S3 Figure S1. MALDI-TOF mass spectral data

**Table S1** MALDI-TOF mass spectral data

| <b>Sequence</b> | <b>MALDI-TOF signal [<math>M^+</math>]</b> |                               |
|-----------------|--------------------------------------------|-------------------------------|
|                 | <b>Calc. <math>m/z</math></b>              | <b>Found <math>m/z</math></b> |
| <b>ODN py</b>   | 7041.5                                     | 7042.9                        |
| <b>ODN C</b>    | 6504.3                                     | 6506.0                        |
| <b>ODN G</b>    | 6966.6                                     | 6967.9                        |

(a)

Kratos PC Axima LNR V2.3.5: Mode linear02, Power: 132, P.Ext. @ 9000 (bin 147)  
%Int. 69 mV[sum= 276 mV] Profiles 5-8 Smooth Gauss 20 -Baseline 30

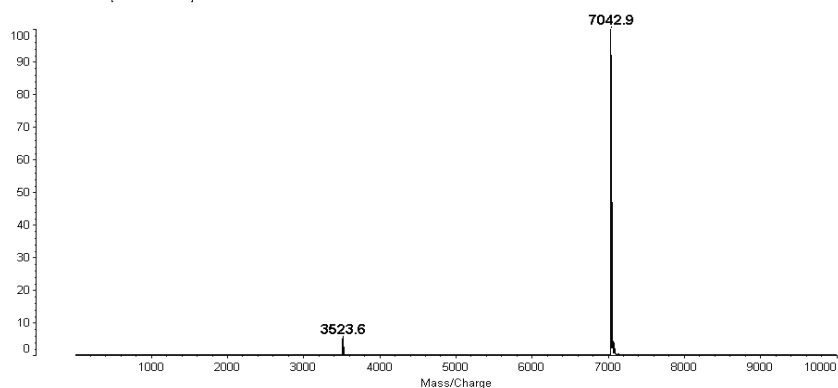

(b)

Kratos PC Axima LNR V2.3.5: Mode linear02, Power: 126, P.Ext. @ 8000 (bin 138)  
%Int. 64 mV[sum= 193 mV] Profiles 1-3 Smooth Gauss 20 -Baseline 30

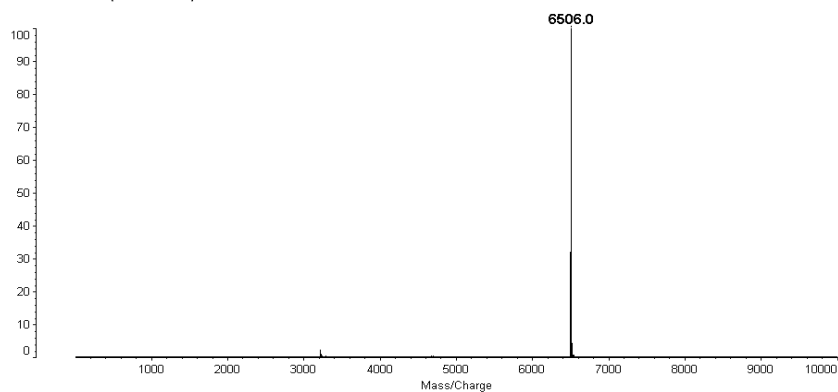

(c)

Kratos PC Axima LNR V2.3.5: Mode linear, Power: 139, P.Ext. @ 8000 (bin 138)  
%Int. 81 mV[sum= 162 mV] Profiles 1-2: Averaged

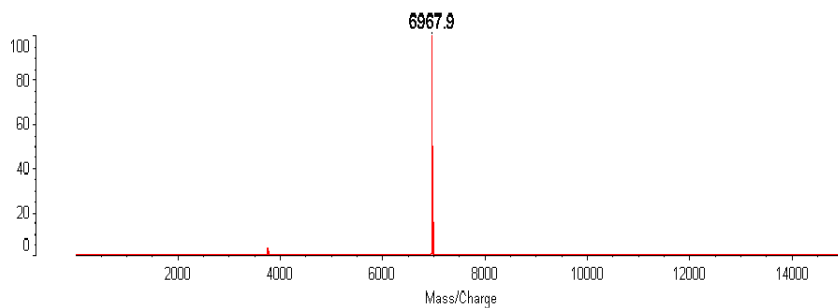

**Fig. S1** MALDI-TOF mass spectral data of (a) **ODN py**, (b) **ODN C**, and (c) **ODN G**
